# Supplementary material for: GCInsights: Consistency in Pyrocartography Starts With Color
Source: Copernicus journal article supplement (doi:10.5194/gc-2024-9), 2024-12-16

Colour-vision-deficiency simulation  
*Deuteranopia*

b) Turbo with isochron lines

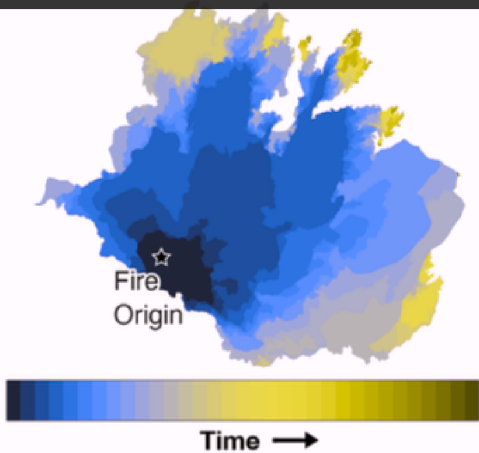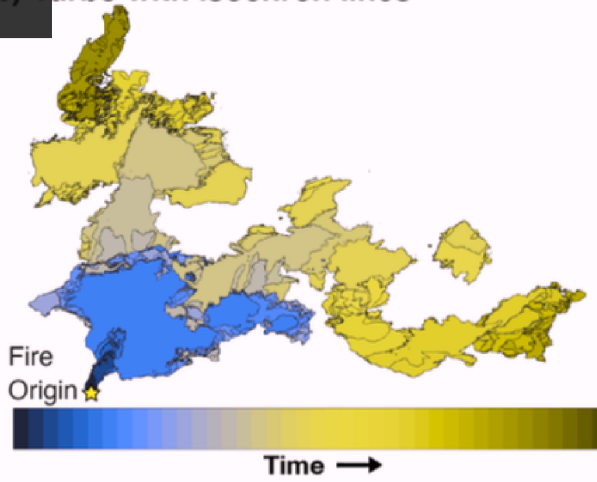

c) Batlow

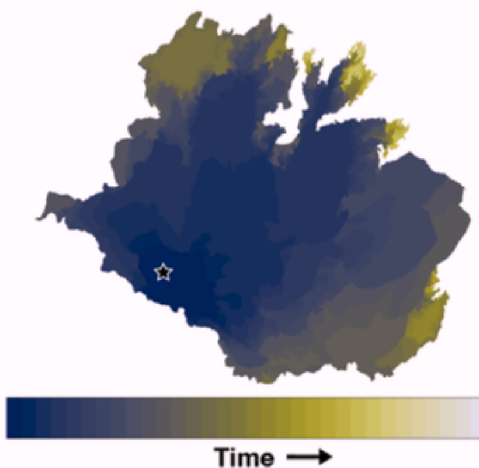

d) Batlow with isochron lines

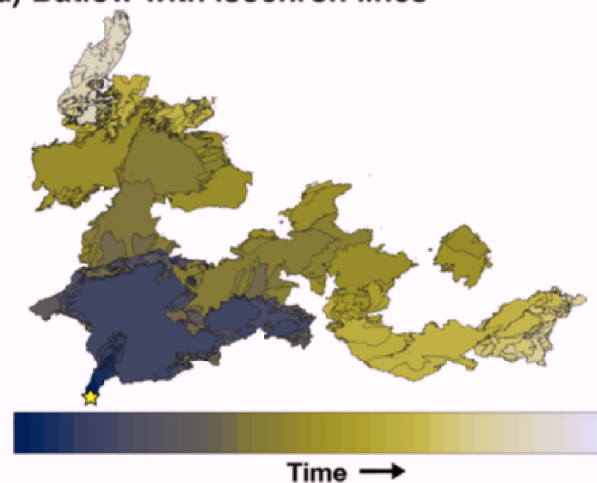

e) Reversed YIOrrd

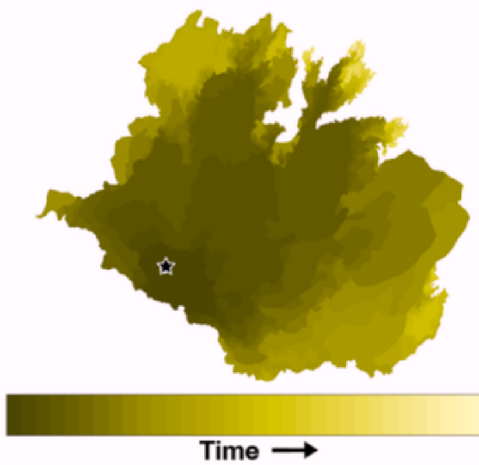

f) Reversed Managua with isochron lines

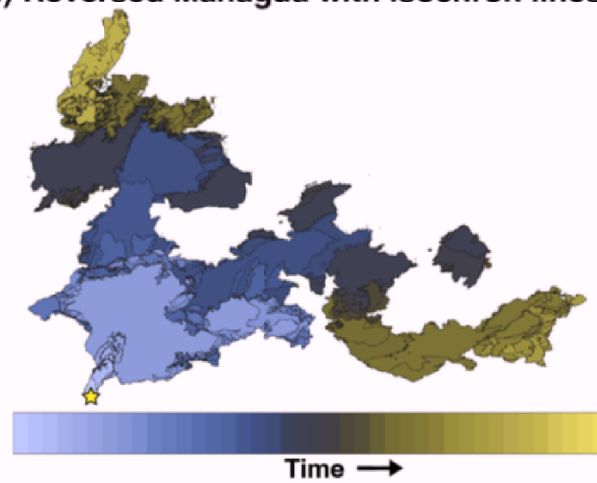

Colour-vision-deficiency simulation  
*Protanopia*

b) Turbo with isochron lines

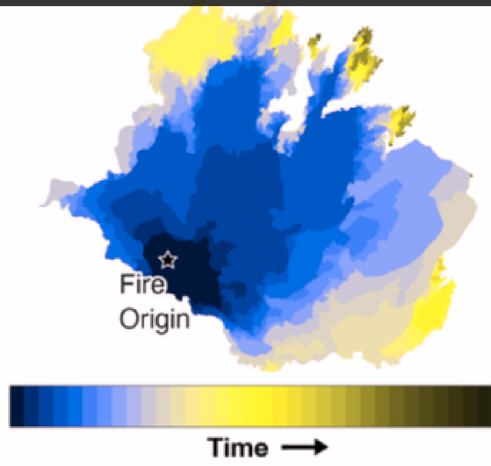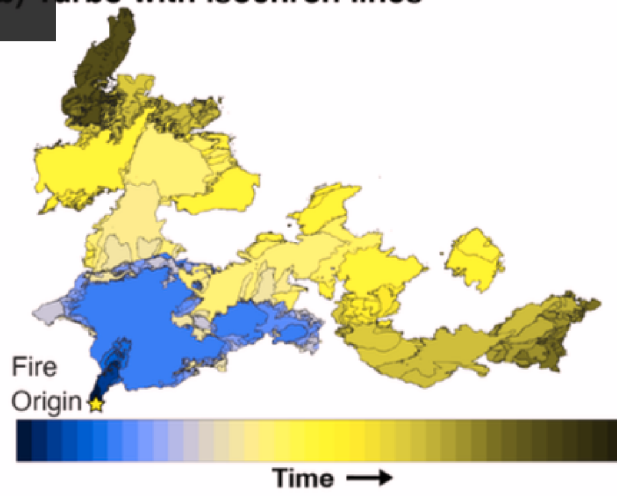

c) Batlow

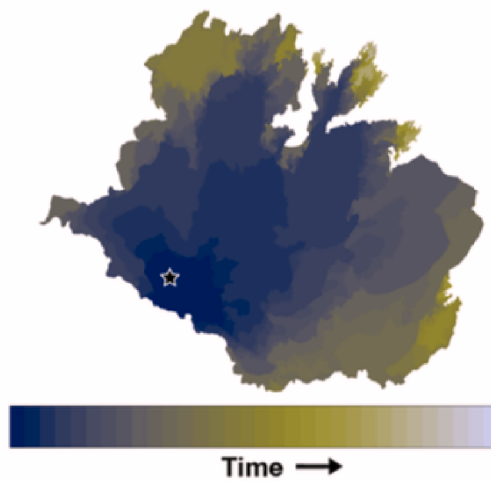

d) Batlow with isochron lines

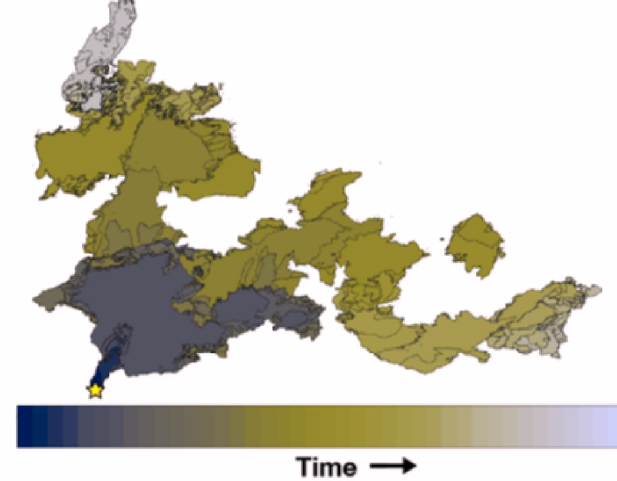

e) Reversed YIOrrd

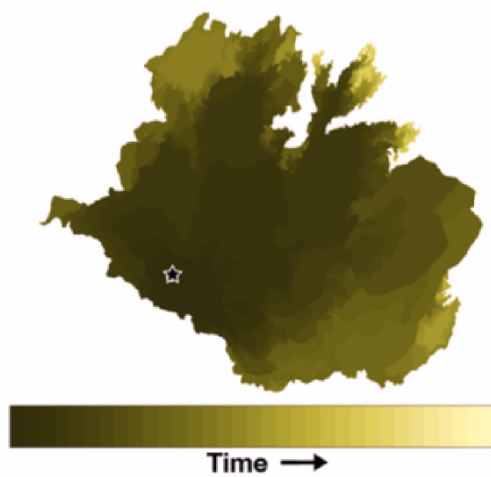

f) Reversed Managua with isochron lines

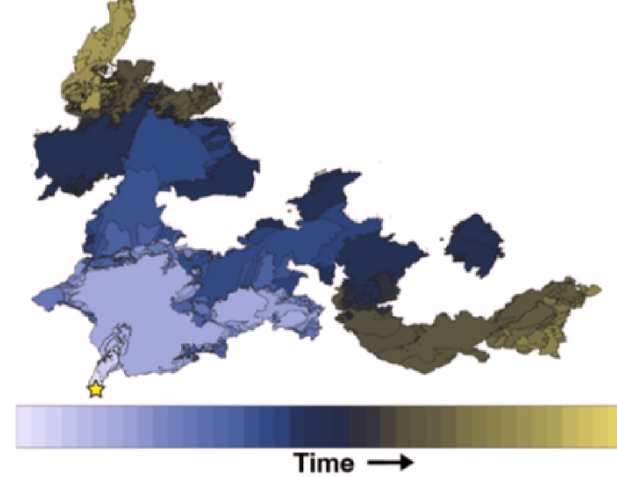

b) Turbo with isochron lines

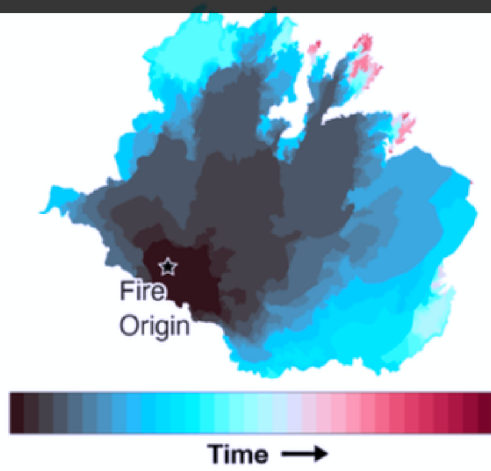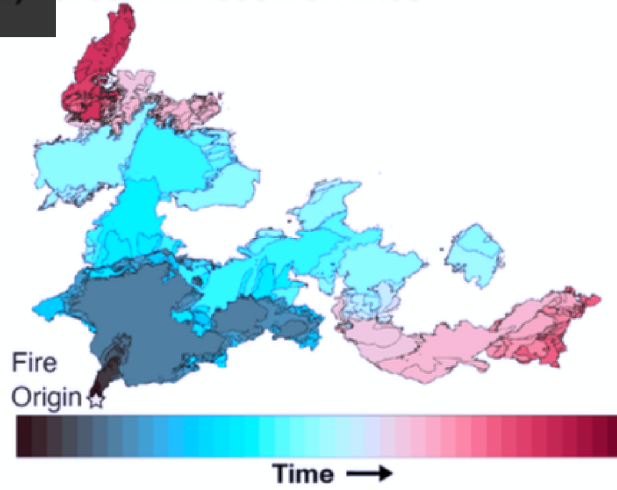

c) Batlow

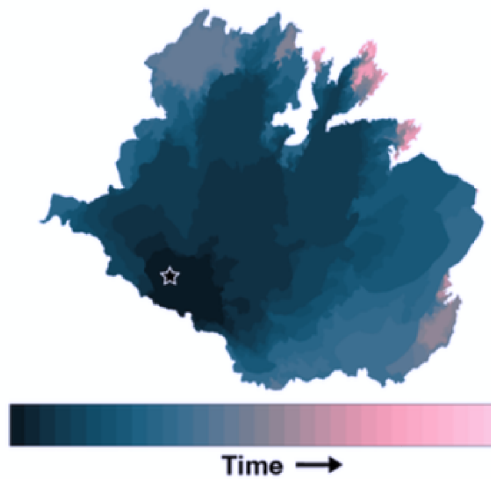

d) Batlow with isochron lines

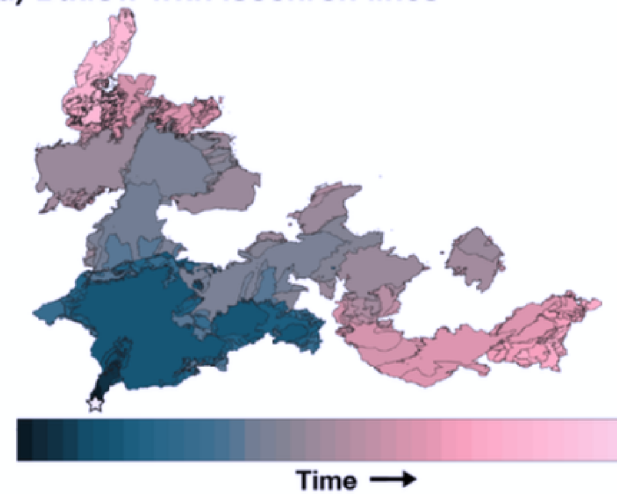

e) Reversed YIOrrd

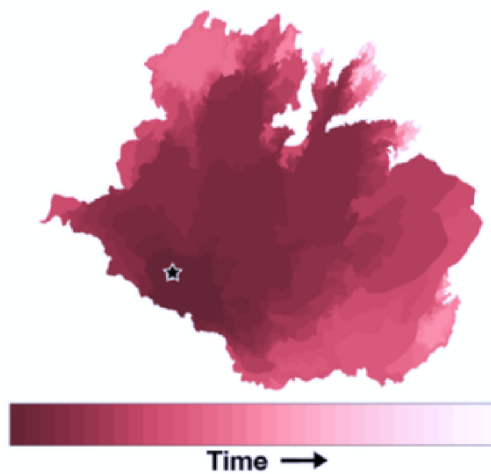

f) Reversed Managua with isochron lines

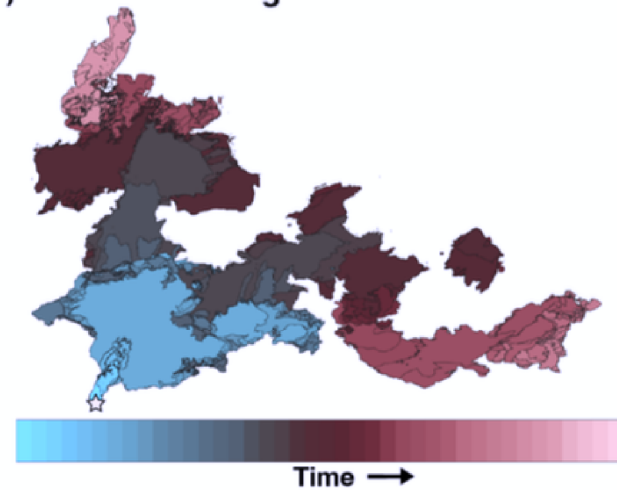

Alternate vision simulation  
*Grey-scale*

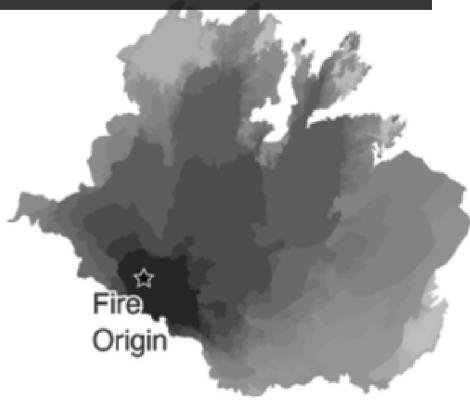

**b) Turbo with isochron lines**

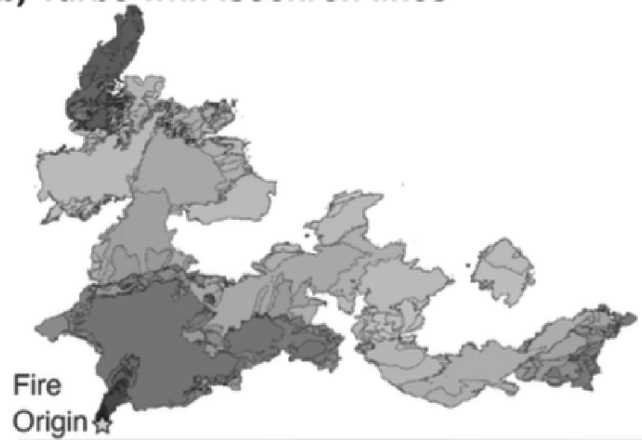

**c) Batlow**

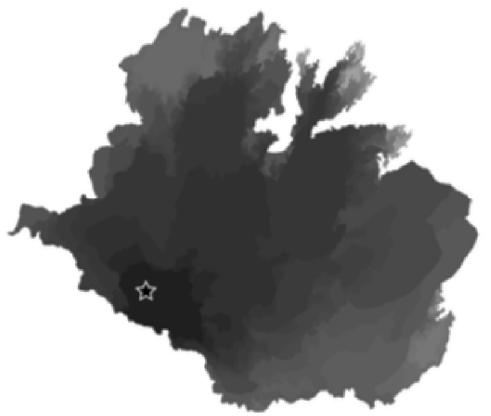

**d) Batlow with isochron lines**

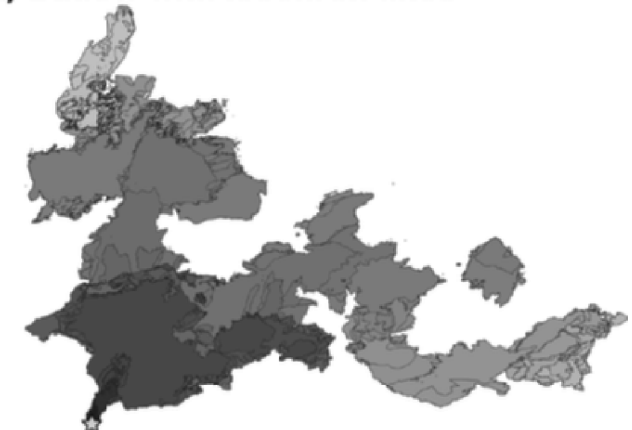

**e) Reversed YIOrrd**

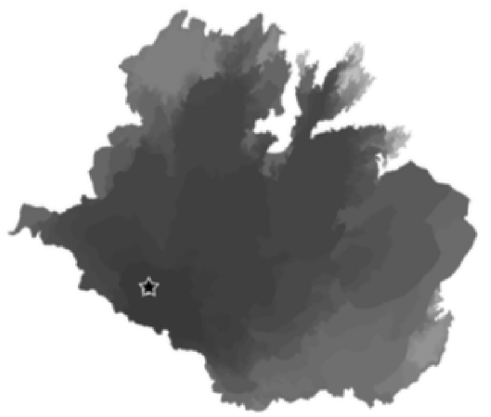

**f) Reversed Managua with isochron lines**

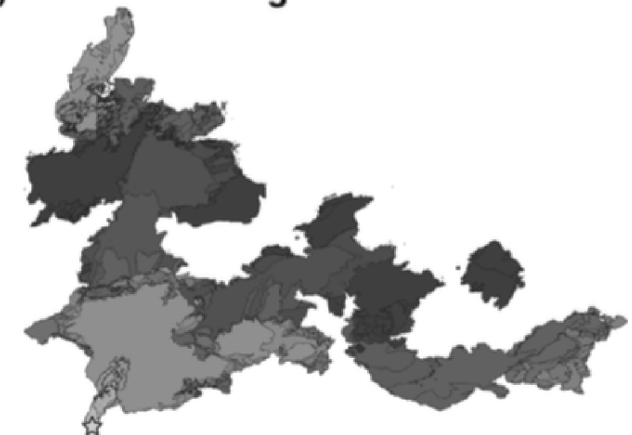

Supplement: Supplementary file [file gc-2024-9-RC1-supplement.pdf]
